# Supplementary figures and images for: Macrophages are essential for CTGF-mediated adult β-cell proliferation after injury
Source: PubMed Central journal article supplement — Mol Metab. 2015 May 19;4(8):584–91. doi: 10.1016/j.molmet.2015.05.002 (PMC4529497; doi:10.1016/j.molmet.2015.05.002), 2015-05-19

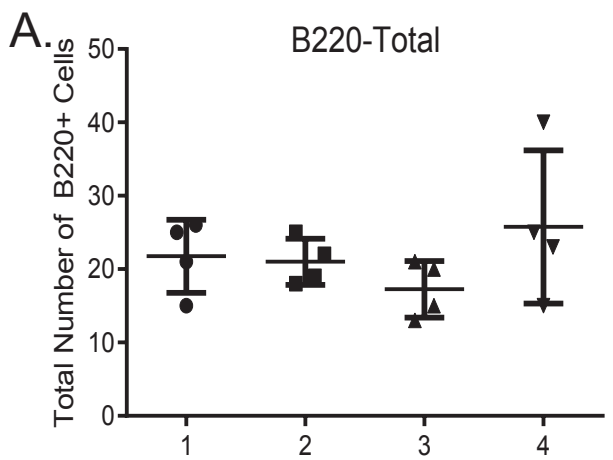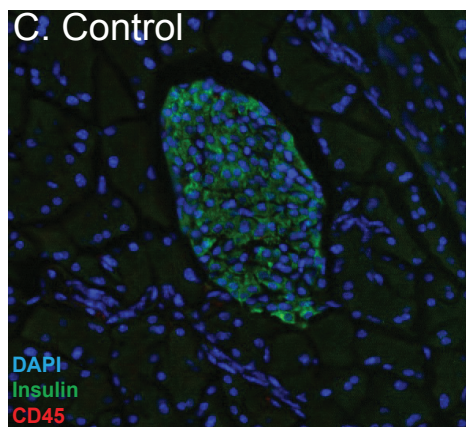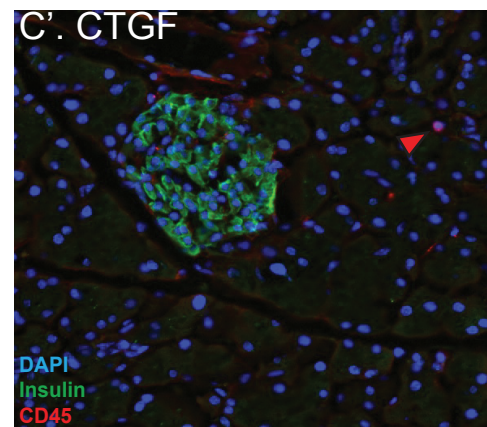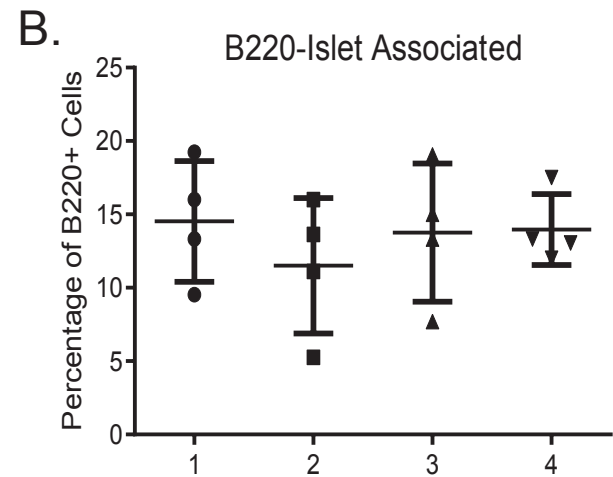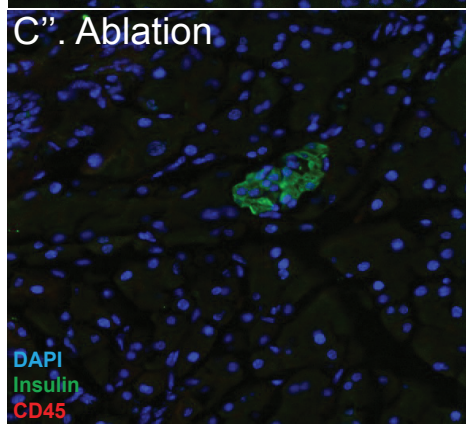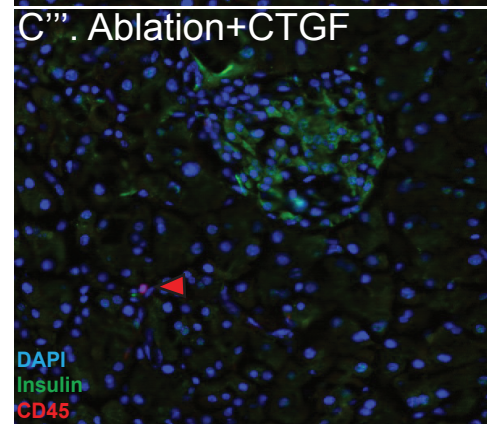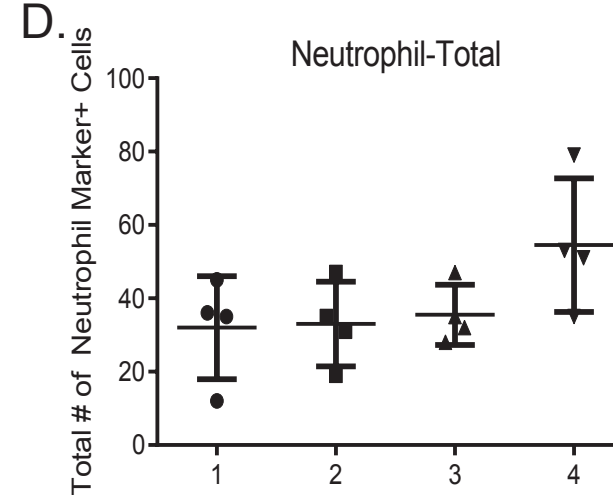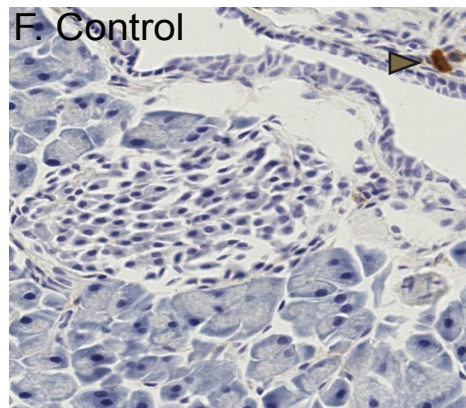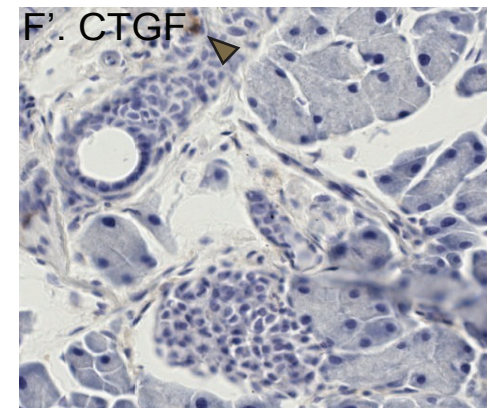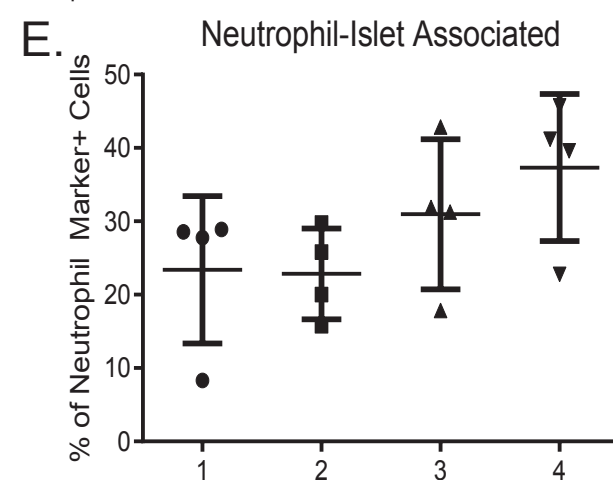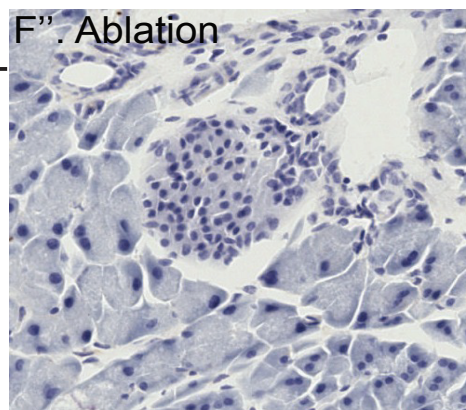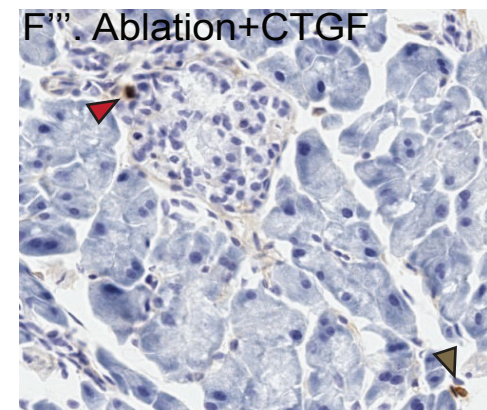

Supplement: mmc1.pdf [file mmc1.pdf]

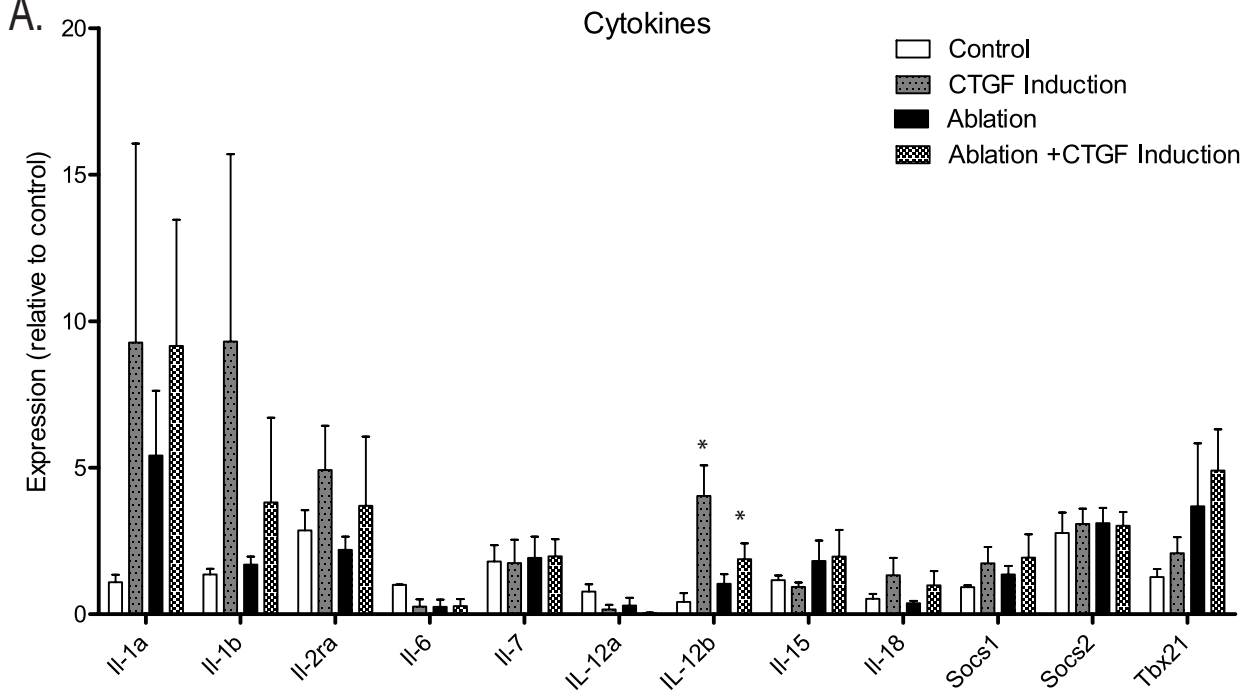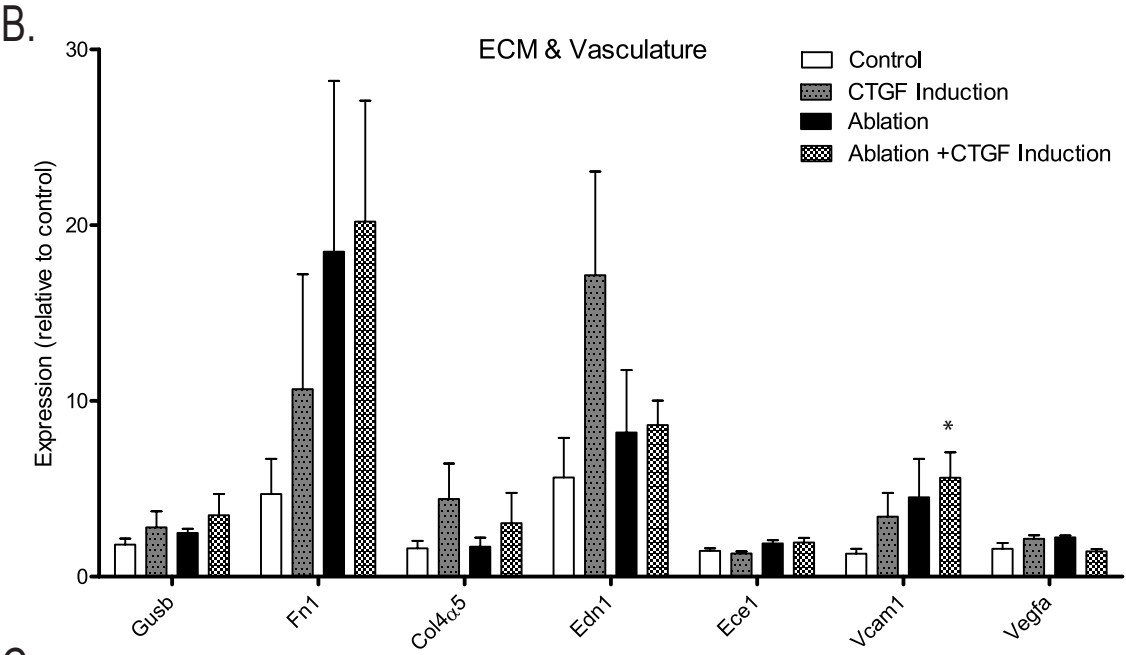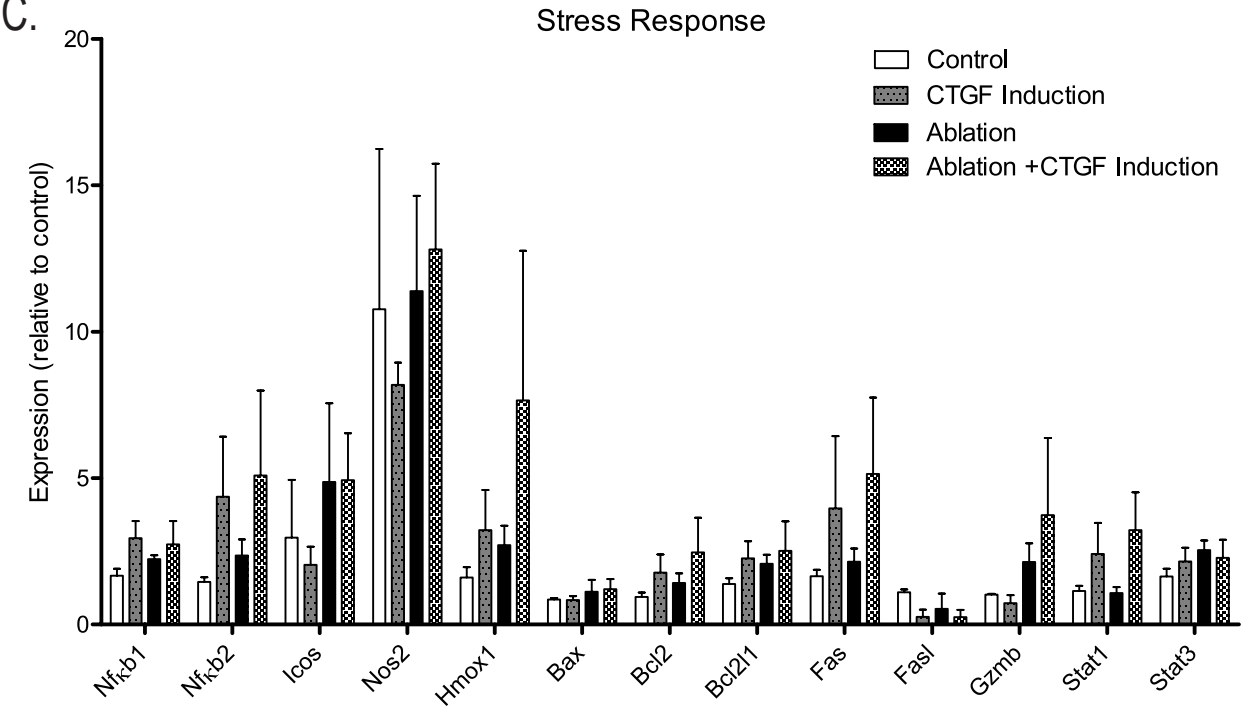

Supplement: mmc2.pdf [file mmc2.pdf]

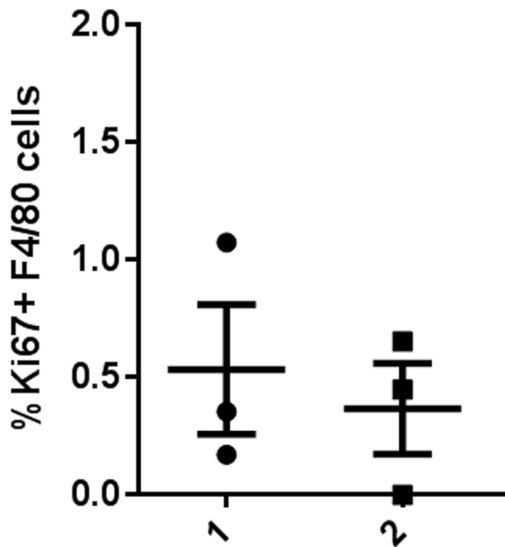

Cohorts:

1. Ablation (Abl) (RIP-rtTA;RIP-DTR +DT)

2. Abl+CTGF (RIP-rtTA;TetO-CTGF;RIP-DTR +DT)

Supplement: mmc3.pdf [file mmc3.pdf]
